# Supplementary material for: Risk Factors for Mortality of Hospitalized Adult Patients with COVID-19 Pneumonia: A Two-Year Cohort Study in a Private Tertiary Care Center in Mexico
Source: MDPI journal article supplement (doi:10.3390/ijerph20054450), 2023-03-02

Supplementary Figure S1. MULBSTA, Charlson and NEWS scales comparisons between survivors and non-survivors.

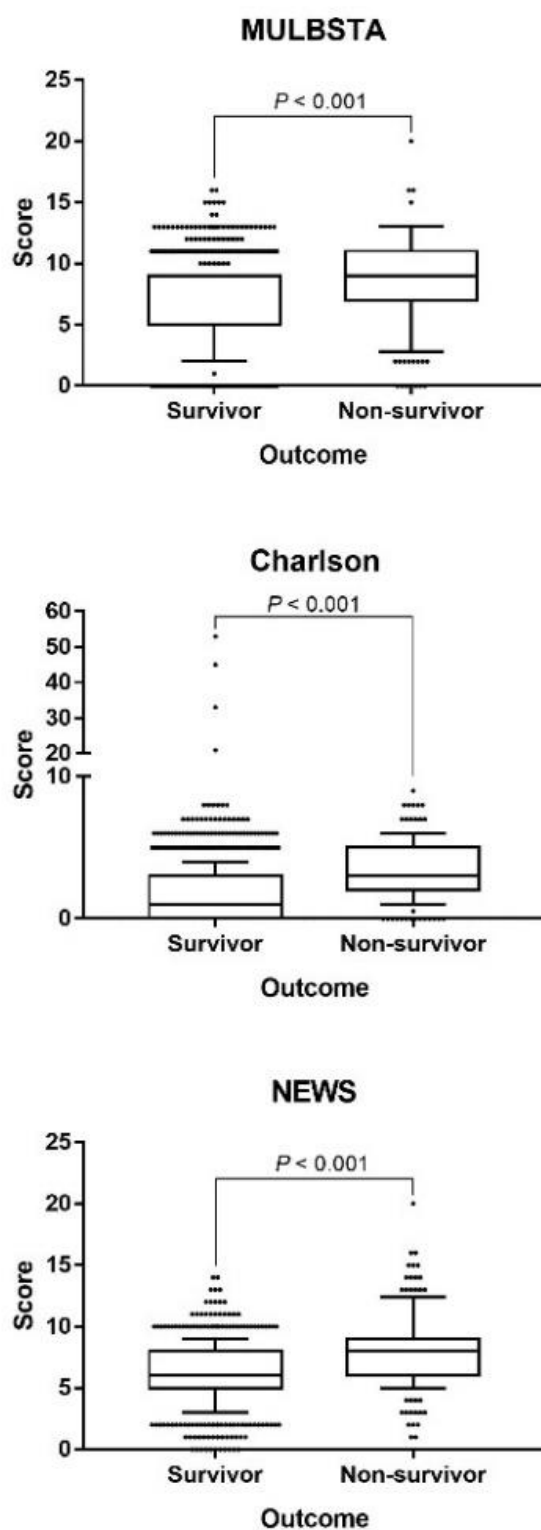

Supplement: s1 [file s1]
