# Supplementary material for: Risk Factors for Mortality of Hospitalized Adult Patients with COVID-19 Pneumonia: A Two-Year Cohort Study in a Private Tertiary Care Center in Mexico
Source: MDPI journal article supplement (doi:10.3390/ijerph20054450), 2023-03-02
Supplement: s1 [file s1]

**Supplementary Table S2. Vaccination**

| Variable              | Total<br>n (%)    | Survivor<br>n (%) | Non-survivor<br>n (%) | P value*               |
|-----------------------|-------------------|-------------------|-----------------------|------------------------|
| Vaccinated (n = 166)  | 12.6%             | 17.2%             | 15.3%                 | 0.618 <sup>&amp;</sup> |
| Astra Zeneca (n = 72) | 5.7% <sup>#</sup> | 41.8%             | 55.0%                 |                        |
| Sinovac (n = 20)      | 1.6% <sup>#</sup> | 11.6%             | 15.0%                 |                        |
| Pfizer (n = 52)       | 4.1% <sup>#</sup> | 33.6%             | 15.0%                 |                        |
| CanSino (n = 7)       | 0.6% <sup>#</sup> | 2.7%              | 2.7%                  |                        |
| J&J (n = 9)           | 0.7% <sup>#</sup> | 15.0%             | 15.0%                 |                        |
| Moderna (n = 6)       | 0.5% <sup>#</sup> | 6.2%              | 6.2%                  |                        |

<sup>&</sup>Survivor vs Non-survivor; <sup>#</sup>percentages are respect vaccinated patients; \*Chi-square<sup>2</sup>
