# Supplementary material for: Risk Factors for Mortality of Hospitalized Adult Patients with COVID-19 Pneumonia: A Two-Year Cohort Study in a Private Tertiary Care Center in Mexico
Source: MDPI journal article supplement (doi:10.3390/ijerph20054450), 2023-03-02
Supplement: s1 [file s1]

**Supplementary Table S1. Causes of death**

| <i>Cause</i>                          | <i>n</i> | <i>%</i> |
|---------------------------------------|----------|----------|
| Multi-organic failure                 | 70       | 42.4     |
| ARDS                                  | 56       | 33.9     |
| Septic shock                          | 18       | 10.9     |
| Unstable bradycardia                  | 6        | 3.6      |
| Myocardial infarction                 | 4        | 2.4      |
| Pulmonary embolism                    | 5        | 3        |
| Hypovolemic shock                     | 4        | 2.4      |
| Unstable supraventricular tachycardia | 1        | 0.6      |
| Stroke                                | 1        | 0.6      |
