# Supplementary material for: Risk Factors for Mortality of Hospitalized Adult Patients with COVID-19 Pneumonia: A Two-Year Cohort Study in a Private Tertiary Care Center in Mexico
Source: MDPI journal article supplement (doi:10.3390/ijerph20054450), 2023-03-02
Supplement: s1 [file s1]

**Supplementary Table S3. Chi-squared tests including observed and expected values**

| Variable                           | Total<br>n (%) | Survivor<br>n (%)<br><i>expected value</i> | Non-survivor<br>n (%)<br><i>expected value</i> | P value <sup>1</sup> |
|------------------------------------|----------------|--------------------------------------------|------------------------------------------------|----------------------|
| Sex (Male/Female), n               | 845/413        | 741/352<br>734.2/358.8                     | 104/61<br>110.8//54.2                          | 0.248*               |
| BMI classification, %              |                |                                            |                                                |                      |
| Underweight                        | 10 (0.8%)      | 9 (0.8%)<br>8.7                            | 1 (0.6%)<br>1.3                                | 0.399*               |
| Normal BMI                         | 240 (19.1%)    | 199 (18.4%)<br>208.5                       | 41 (24.8%)<br>31.5                             |                      |
| Overweight                         | 486 (38.6%)    | 423 (38.3%)<br>422.3                       | 63 (38.2%)<br>63.7                             |                      |
| Obesity grade I                    | 322 (25.6%)    | 285 (26.1%)<br>279.8                       | 37 (22.4%)<br>42.2                             |                      |
| Obesity grade II                   | 114 (9.1%)     | 103 (9.3%)<br>99.0                         | 11 (6.7%)<br>15.0                              |                      |
| Obesity grade III                  | 86 (6.8%)      | 74 (7.0%)<br>74.7                          | 12 (7.3%)<br>11.3                              |                      |
| Hypertension (%)                   | 427 (33.9%)    | 346 (31.7%)<br>371.0                       | 81 (49.1%)<br>56.0                             | <0.001*              |
| Diabetes (%)                       | 270 (21.5%)    | 216 (19.8%)<br>234.6                       | 54 (32.7%)<br>35.4                             | <0.001*              |
| COPD (%)                           | 34 (2.7%)      | 22 (2.0%)<br>29.5                          | 12 (7.3%)<br>4.5                               | 0.001*               |
| Asma (%)                           | 27 (2.1%)      | 25 (2.3%)<br>23.5                          | 2 (1.2%)<br>3.5                                | 0.422*               |
| Immunosuppression (%)              | 56 (4.5%)      | 42 (3.8%)<br>48.7                          | 14 (8.5%)<br>7.3                               | 0.010*               |
| Cancer (%)                         | 60 (4.8%)      | 42 (3.8%)<br>52.1                          | 18 (10.9%)<br>7.9                              | <0.001*              |
| HIV (%)                            | 2 (0.2%)       | 2 (0.2%)<br>1.7                            | 0 (0%)<br>0.3                                  | >0.999*              |
| Previous stroke (%)                | 16 (1.3%)      | 11 (1.0%)<br>13.9                          | 5 (3.0%)<br>2.1                                | >0.999*              |
| CKD (%)                            | 49 (3.9%)      | 39 (3.6%)<br>42.6                          | 10 (6.1%)<br>6.4                               | 0.021*               |
| Organ transplant recipient (%)     | 16 (1.3%)      | 14 (1.3%)<br>13.9                          | 2 (1.2%)<br>2.1                                | >0.999*              |
| Chronic liver disease (%)          | 9 (0.7%)       | 8 (0.7%)<br>7.8                            | 1 (0.6%)<br>1.2                                | >0.999*              |
| ACEI/ARA (%)                       | 283 (22.5%)    | 234 (21.4%)<br>245.9                       | 49 (29.7%)<br>37.1                             | 0.021*               |
| Previous myocardial infarction (%) | 35 (2.8%)      | 23 (2.1%)<br>30.4                          | 12 (7.3%)<br>4.6                               | 0.001*               |
| Depression (%)                     | 17 (1.4%)      | 15 (1.4%)                                  | 2 (1.2%)                                       | 0.830*               |

|                                   |               | 14.8                    | 2.2                  |         |
|-----------------------------------|---------------|-------------------------|----------------------|---------|
| Smoker (%)                        |               |                         |                      |         |
| Never                             | 808 (64.2%)   | 715 (65.4%)<br>702.0    | 93 (56.4%)<br>106.0  | 0.071*  |
| Unknown                           | 301 (23.9%)   | 257 (23.5%)<br>261.5    | 44 (26.7%)<br>39.5   |         |
| Currently                         | 65 (5.2%)     | 54 (4.9%)<br>56.5       | 11 (6.7%)<br>8.5     |         |
| Former                            | 84 (6.7%)     | 67 (6.1%)<br>73.0       | 17 (10.3%)<br>11.0   |         |
| Alcohol use (%)                   |               |                         |                      |         |
| Never                             | 805 (64.0%)   | 700 (64.0%)<br>699.4    | 105 (63.6%)<br>105.6 | 0.114*  |
| Unknown                           | 330 (26.2%)   | 279 (25.5%)<br>286.7    | 51 (30.9%)<br>43.3   |         |
| Currently                         | 109 (8.7%)    | 102 (9.3%)<br>94.7      | 7 (4.2%)<br>14.3     |         |
| Former                            | 14 (1.1%)     | 12 (1.1%)<br>12.2       | 2 (1.2%)<br>1.8      |         |
| COVID-19 pneumonia on imaging (%) | 1,133 (90.1%) | 981 (90.2)<br>983.8     | 152 (92.1)<br>149.2  | 0.480*  |
| NIH severity scale (%)            |               |                         |                      |         |
| Critical                          | 64 (5.1%)     | 26 (2.4%)<br>55.6       | 38 (23.0%)<br>8.4    | <0.001* |
| Moderate                          | 90 (7.2%)     | 85 (7.8%)<br>78.2       | 5 (3.0%)<br>11.8     |         |
| Severe                            | 1,104 (87.8%) | 982 (89.8%)<br>959.2    | 122 (73.9%)<br>144.8 |         |
| qSOFA (%) n                       |               |                         |                      |         |
| 0                                 | 354 (28.1%)   | 329 (30.1%)<br>307.6    | 25 (15.2%)<br>46.4   | <0.001* |
| 1                                 | 816 (64.9%)   | 714 (65.3%)<br>709.9    | 102 (61.8%)<br>107.0 |         |
| 2                                 | 71 (5.6%)     | 47 (4.3%)<br>61.7       | 24 (14.5%)<br>9.3    |         |
| 3                                 | 17 (1.4%)     | 3 (0.3%)<br>14.8        | 14 (8.5%)<br>2.2     |         |
| Fever (%) n                       | 756 (60.1%)   | 658 (60.2%)             | 98 (59.4%)           | 0.865*  |
| AVPU score                        |               |                         |                      |         |
| Alert                             | 1,196 (95.1%) | 1,066 (97.5%)<br>1039.1 | 130 (78.8%)<br>156.9 | <0.001* |
| Voice                             | 30 (2.4%)     | 17 (1.6%)<br>26.1       | 13 (7.9%)<br>3.9     |         |
| Pain                              | 7 (0.6%)      | 1 (0.1%)<br>6.1         | 6 (3.6%)<br>0.9      |         |
| Unresponsive                      | 25 (2.0%)     | 9 (0.8%)                | 16 (9.7%)            |         |

|                            |               |                      |                      |         |
|----------------------------|---------------|----------------------|----------------------|---------|
|                            |               | 21.7                 | 3.3                  |         |
| Cough (%)                  | 838 (66.6%)   | 726 (66.4%)<br>728.1 | 112 (67.9%)<br>109.9 | 0.724*  |
| Headache (%)               | 538 (42.8%)   | 478 (43.7%)<br>467.4 | 60 (36.4%)<br>70.6   | 0.077*  |
| Dyspnea (%)                | 1,041 (82.8%) | 892 (81.6%)<br>904.5 | 149 (90.3%)<br>136.5 | 0.008*  |
| Diarrhea (%)               | 252 (20.0%)   | 224 (20.5%)<br>218.9 | 28 (17.0%)<br>33.1   | 0.300*  |
| Chest pain (%)             | 224 (17.8%)   | 193 (17.7%)<br>194.6 | 31 (18.8%)<br>29.4   | 0.743*  |
| Chills (%)                 | 309 (24.6%)   | 275 (25.7%)<br>268.5 | 34 (16.4%)<br>40.5   | 0.210*  |
| Odynophagia (%)            | 308 (24.5%)   | 281 (37.4)<br>267.6  | 27 (29.7%)<br>40.4   | 0.011*  |
| Myalgias (%)               | 458 (36.4%)   | 409 (37.4%)<br>397.9 | 49 (29.7%)<br>60.1   | 0.057*  |
| Arthralgias (%)            | 406 (32.3%)   | 357 (32.7%)<br>352.7 | 49 (29.7%)<br>53.3   | 0.476*  |
| Malaise (%)                | 880 (70.0%)   | 769 (70.4%)<br>764.6 | 111 (67.3%)<br>115.4 | 0.466*  |
| Rhinorrhea (%)             | 151 (12.0%)   | 135 (12.4%)<br>131.2 | 16 (9.7%)<br>19.8    | 0.370*  |
| Vomiting (%)               | 93 (7.4%)     | 83 (7.6%)<br>80.8    | 10 (6.1%)<br>12.2    | 0.529*  |
| Abdominal pain (%)         | 77 (6.1%)     | 64 (5.9%)<br>66.9    | 13 (7.9%)<br>10.1    | 0.382*  |
| Conjunctivitis (%)         | 22 (1.7%)     | 20 (1.8%)<br>19.1    | 2 (1.2%)<br>2.9      | 0.757*  |
| Cyanosis (%)               | 101 (8.0%)    | 71 (6.5%)<br>87.8    | 30 (18.2%)<br>13.2   | <0.001* |
| Anosmia (%)                | 145 (11.5%)   | 135 (12.4%)<br>126.0 | 10 (6.1%)<br>19.0    | 0.018*  |
| Dysgeusia (%)              | 129 (10.3%)   | 118 (10.8%)<br>112.1 | 11 (6.7%)<br>16.9    | 0.129*  |
| Glasgow Coma Scale <15 (%) | 77 (6.1%)     | 43 (3.9%)<br>66.9    | 34 (20.6)<br>10.1    | <0.001* |

<sup>1</sup>Comparisons are between survivors and non-survivors; \*chi-square test with Exact Fisher's test if apply.
